# Supplementary material for: Emergence of new red-shifted carbon nanotube photoluminescence based on proximal doped-site design
Source: PubMed Central journal article supplement (PMC4921849; doi:10.1038/srep28393), 2016-06-27
Supplement: srep28393-s1.pdf [file srep28393-s1.pdf]

## Supplementary Information

### Emergence of new red-shifted carbon nanotube photoluminescence based on proximal doped-site design

Tomohiro Shiraki<sup>\*1,2</sup>, Tomonari Shiraishi<sup>1</sup>, Gergely Juhász<sup>3</sup> & Naotoshi Nakashima<sup>\*1,2</sup>

<sup>1</sup> Department of Applied Chemistry, Graduate School of Engineering, Kyushu University, 744

Motooka, Nishi-ku, Fukuoka 819-0395, Japan. <sup>2</sup> International Institute for Carbon-Neutral Energy

Research (WPI-I2CNER), Kyushu University, 744 Motooka, Nishi-ku, Fukuoka, Japan. <sup>3</sup>

Department of Chemistry, Graduate School of Science, Tokyo Institute of Technology, Ookayama,

Meguro-ku, Tokyo, 152-8550, Japan.

Correspondence and requests for materials should be addressed to T.S. (email:

shiraki.tomohiro.992@m.kyushu-u.ac.jp) or N.N. (email:

nakashima.naotoshi.614@m.kyushu-u.ac.jp).

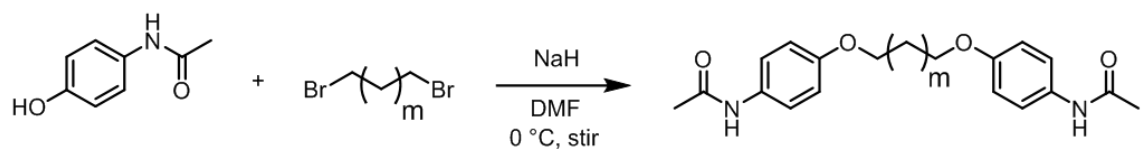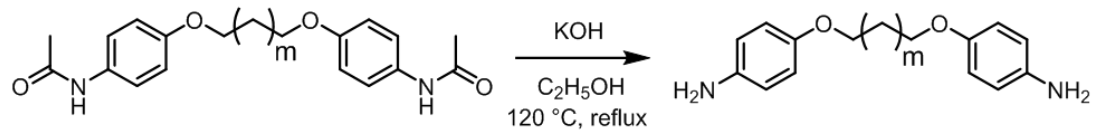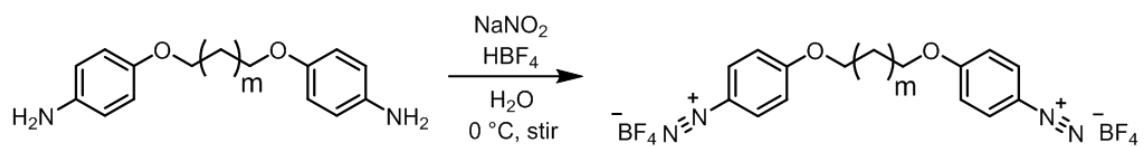

m = 1 : 2DzAr3

m = 3 : 2DzAr5

m = 7 : 2DzAr9

**Figure S1.** Synthetic routes of the 2DzAr<sub>n</sub> (n = 3, 5 and 9).

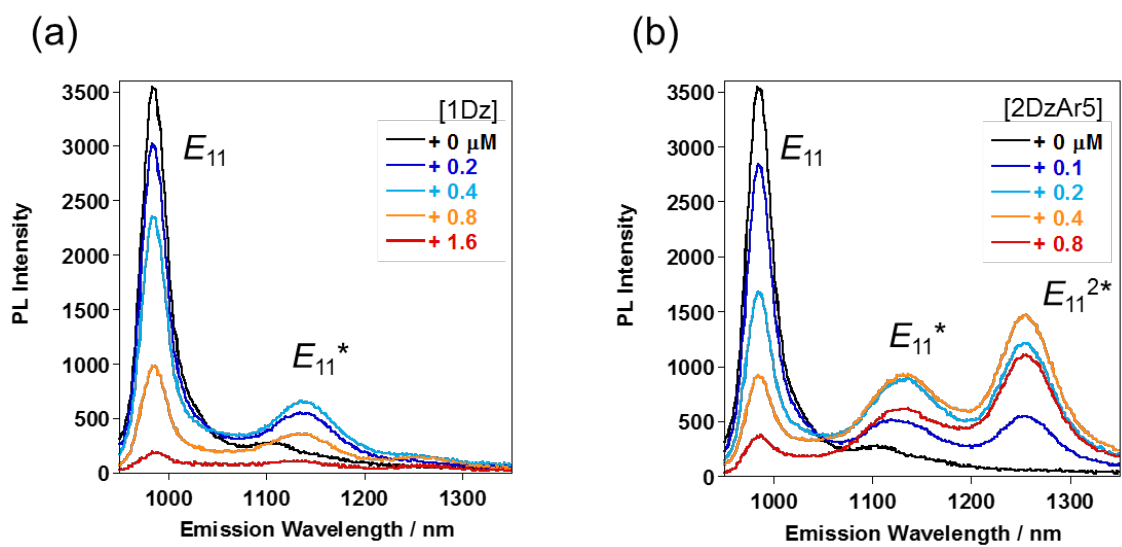

**Figure S2.** PL spectral changes of (a) SWNT/1Dz and (b) SWNT/2DzAr5 with respect to concentrations of the added diazonium compounds.

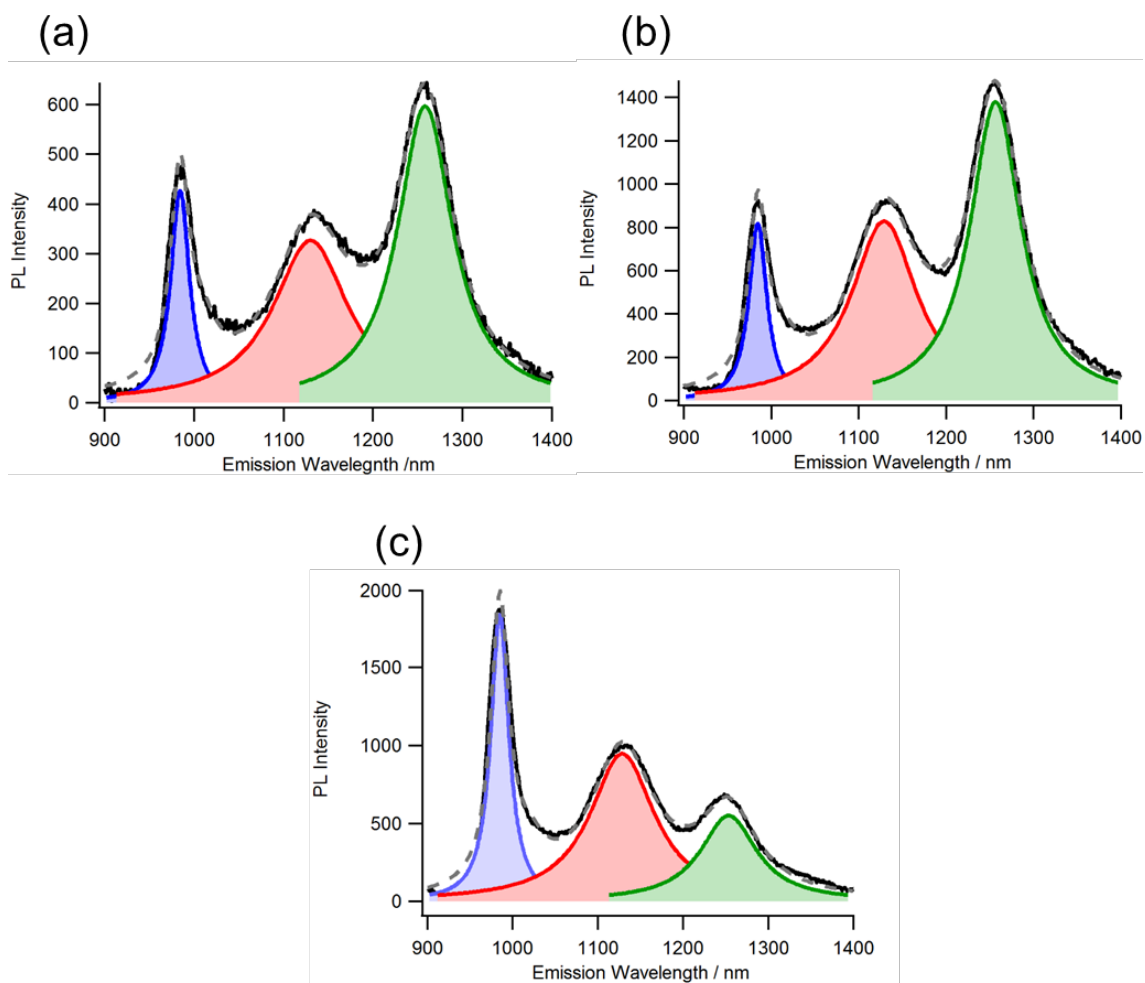

**Figure S3.** Deconvoluted PL spectra of (a) SWNT/2DzAr3, (b) SWNT/2DzAr5 and (c) SWNT/2DzAr9 in D<sub>2</sub>O. [2DzArn] = 0.4 μM.

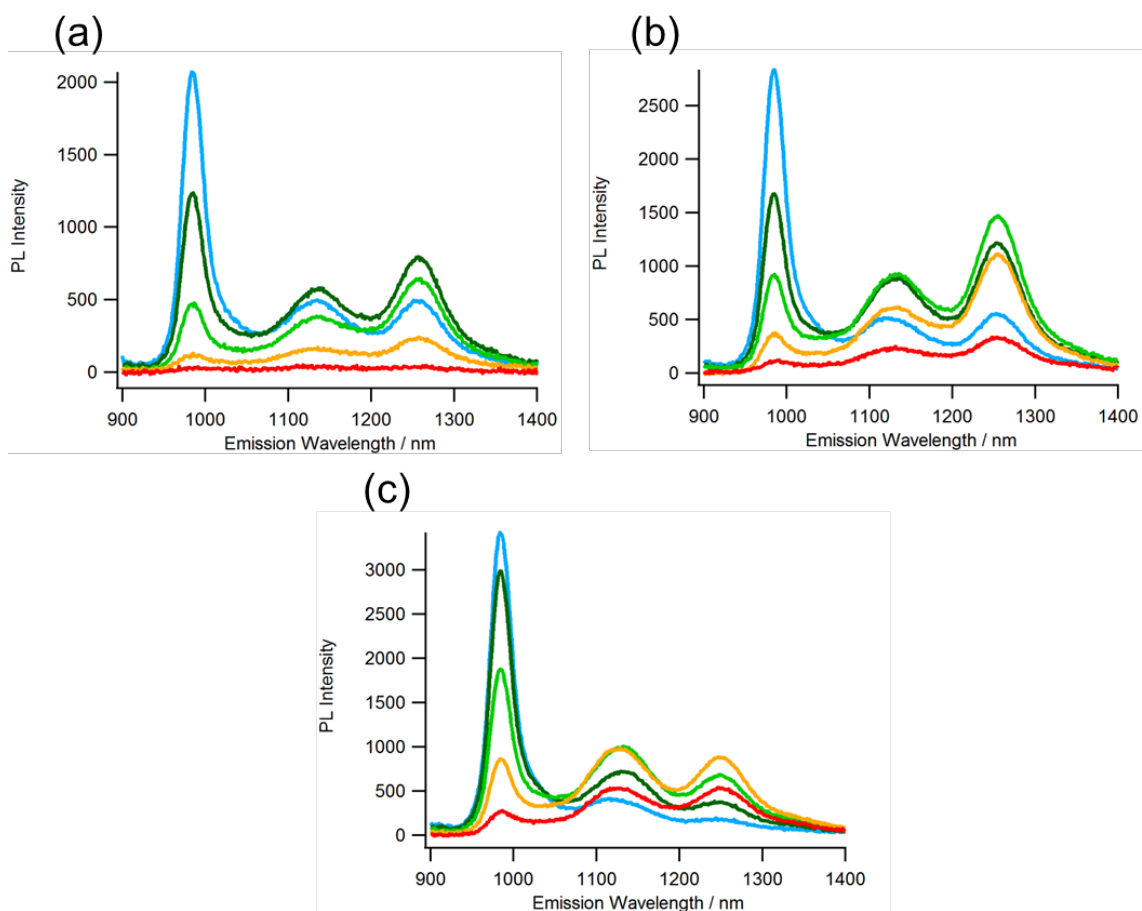

**Figure S4.** PL spectra of (a) SWNT/2DzAr3, (b) SWNT/2DzAr5 and (c) SWNT/2DzAr9 prepared by using different concentrations of 2DzAr: [2DzAr] = 0.10 (light blue), 0.20 (dark green), 0.40 (bright green), 0.80 (orange) and 1.6  $\mu$ M (red).

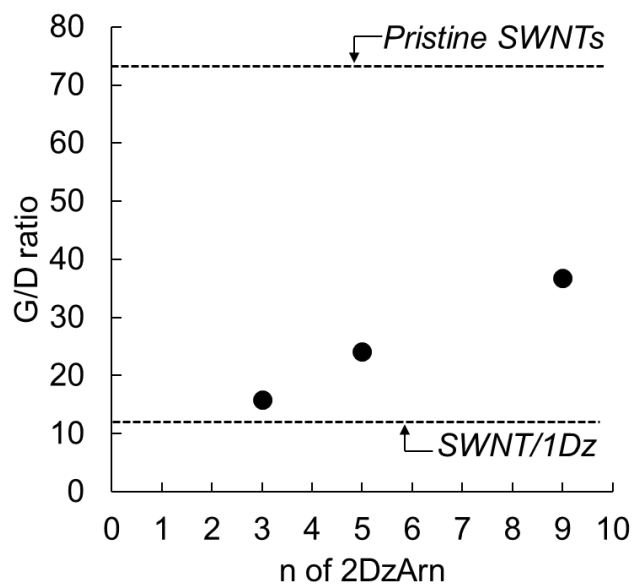

**Figure S5.** G/D ratios of SWNT/2DzArn, SWNT/1Dz and pristine SWNTs. The laser light with 570 nm was utilized for excitation and was irradiated to the D<sub>2</sub>O dispersion samples. [2DzArn] = 0.4 μM and [1Dz] = 0.8 μM was used for chemical modification to prepare the same concentrations based on the diazonium group.

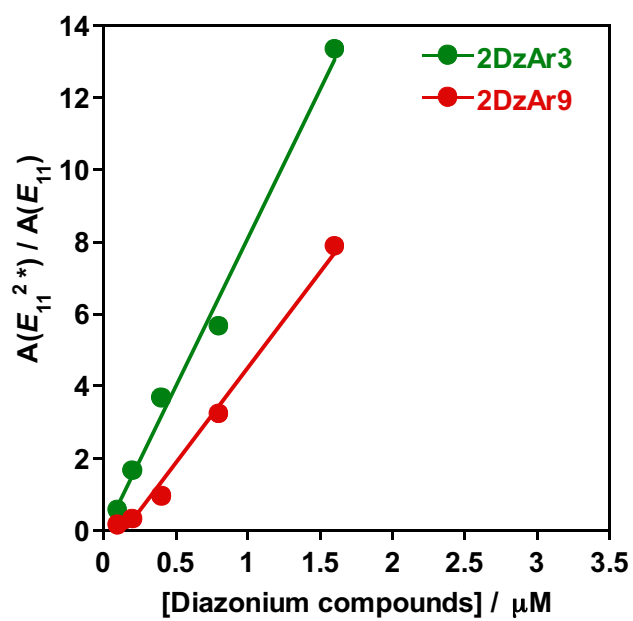

**Figure S6.** Integrated area ratio of  $E_{11}^{2*}$  to  $E_{11}^*$  as a function of the diazonium concentrations for SWNT/2DzAr3 (green dot) and SWNT/2DzAr9 (red dot).

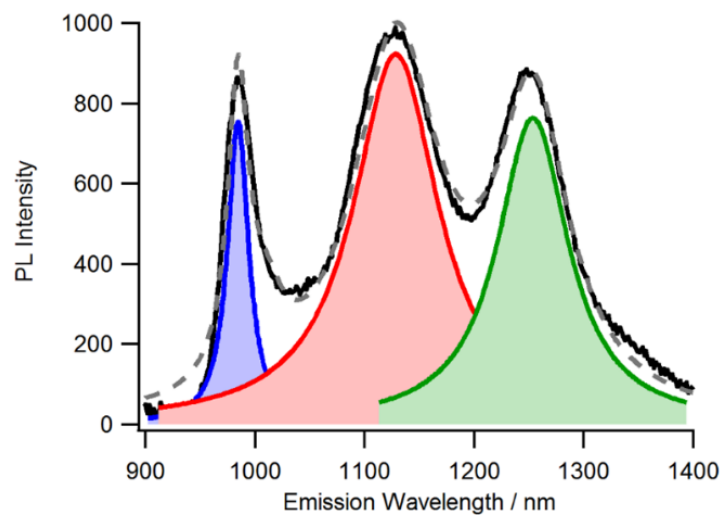

**Figure S7.** PL spectrum of SWNT/2DzAr9 prepared by using 0.80  $\mu\text{M}$  2DzAr9.
